# Supplementary material for: Properties of the Multiclass Traffic Network Equilibria Under a Tradable Credit Scheme
Source: Atypon-hosted journal article supplement (doi:10.1287/trsc.2013.0508), 2014-04-18
Supplement: trsc.2013.0508-sm.pdf [file trsc.2013.0508-sm.pdf]

## Appendix A: Detailed computational process for Table 1

### Problem 1:

Firstly, it is easy to verify the satisfiability of Condition A and C. The equilibrium total flow can be obtained from the flow conservation and credit conservation conditions:

$$\begin{cases} X_1 + X_2 = 18, \\ 5X_1 + 2X_2 = 60. \end{cases} \Rightarrow \begin{cases} X_1^* = 8, \\ X_2^* = 10. \end{cases}$$

So  $X^*$  is uniquely determined, and there exists one unique break point  $\hat{\alpha} = \frac{14}{9} \in (1, 2)$  such that

$$d \int_{\hat{\alpha}}^2 h(\alpha) d\alpha = X_1^*, \quad d \int_1^{\hat{\alpha}} h(\alpha) d\alpha = X_2^*.$$

Apparently, both path 1 and path 2 are strongly undominated, so Condition B is satisfied. From the equality  $16\hat{\alpha} + 5p^* = 20\hat{\alpha} + 2p^*$ , we can obtain the unique equilibrium credit price  $p^* = \frac{56}{27}$ .

### Problem 2:

The same data described in Problem 1 is utilized, except the density function

$$h(\alpha) = \begin{cases} \frac{100}{18}, & \alpha \in [1, 1.1]; \\ \frac{80}{18}, & \alpha \in [1.9, 2]; \\ 0 & \text{otherwise.} \end{cases}$$

For any  $\alpha' \in (1.1, 1.9)$ ,  $h(\alpha') = 0$ . So when  $\alpha=1.1$ , it is impossible to find  $\delta$ , such that  $\rho * h(\rho * \alpha) > h(\alpha)$  is always fulfilled for any  $\rho \in [1, 1 + \delta]$ . Condition C thus fails.

The total flows satisfy the same flow and credit conservation condition as in Problem 1, therefore we still have  $X_1^* = 8$  and  $X_2^* = 10$ . And it is easy to verify that users on path 1 have a high VOT with  $\alpha \in [1.9, 2]$ , and users on path 2 have a low VOT with  $\alpha \in [1, 1.1]$ . From the following user equilibrium conditions:  $16\alpha + 5p^* > 20\alpha + 2p^*$ , for  $\alpha \in [1, 1.1]$ ;  $16\alpha + 5p^* < 20\alpha + 2p^*$ , for  $\alpha \in [1.9, 2]$ , we obtain the equilibrium credit price  $p^*$  belonging to  $[22/15, 38/15]$ .

At maximum equilibrium credit price  $p_{\max}^* = 38/15$ , the breakpoint  $\hat{\alpha} = 1.9$ , so both path 1 and path 2 are strongly undominated, Condition B thus is satisfied at  $p_{\max}^* = 38/15$ .

### Problem 3:

Similarly as in Problem 1, Condition A and C are easy to verify. The equilibrium total flow can be obtained from the following equation:

$$\begin{cases} X_1 + X_2 = 18, \\ 5X_1 + 2X_2 = 90. \end{cases} \Rightarrow \begin{cases} X_1^* = 18, \\ X_2^* = 0. \end{cases}$$

If  $\hat{\alpha}$  is the breakpoint, then it satisfies the following equations:

$$d \int_{\hat{\alpha}}^2 h(\alpha) d\alpha = 18, \quad d \int_1^{\hat{\alpha}} h(\alpha) d\alpha = 0.$$

From the following traffic equilibrium condition:  $18\alpha + 5p^* < 27\alpha + 2p^*$ , for any  $\alpha \in [1, 2]$ , we obtain equilibrium credit price  $p^* \in [0, 3]$ . At maximum equilibrium credit price  $p_{\max}^* = 3$ , the breakpoint  $\hat{\alpha} = 1$ , path 2 is weakly undominated, Condition B is thus violated.

**Problem 4:**

$$K = \min_{x \in \Omega_x} \langle \kappa, x \rangle = 36.$$

So Condition A is violated. The equilibrium total flow can be obtained from the following equation:

$$\begin{cases} X_1 + X_2 = 18, \\ 5X_1 + 2X_2 = 36. \end{cases} \Rightarrow \begin{cases} X_1^* = 0, \\ X_2^* = 18. \end{cases}$$

Apparently, path 1 is not strongly undominated, so Condition B is violated. From the traffic equilibrium condition,  $36\alpha + 2p^* < 40\alpha + 5p^*$  for any  $\alpha > 0$ , we have  $p^* > 0$ .

**Appendix B: Sensitivity analysis of the MNEPTCS**

To establish the stability of optimal credit scheme design, we provide a sensitivity analysis of the MNEPTCS with credit scheme parametric  $(\kappa, K)$ .

Now consider the multiclass equilibrium problem with credit scheme parameters: Find  $x(\kappa, K) \in \Gamma_x(\kappa, K)$ , such that

$$\text{VI}_x(\kappa, K) : \quad \langle \alpha F(X(\kappa, K)), x - x(\kappa, K) \rangle \geq 0, \quad \forall x \in \Gamma_x(\kappa, K).$$

where  $\Gamma_x(\kappa, K) = \{x | x \in \Omega_x, \langle \kappa, X \rangle \leq K\}$ . Using the same technique described in Section 2, the parametric variational inequality  $\text{VI}_x(\kappa, K)$  can be formulated as the following parametric variational inequality systems:

Find  $x(\kappa, K) \in \Omega_x$ ,  $p^*(\kappa, K) \geq 0$  such that

$$\text{VIS}_x(\kappa, K) : \quad \langle \alpha F(X(\kappa, K)) + p^*(\kappa, K)\kappa, x - x(\kappa, K) \rangle \geq 0, \quad \forall x \in \Omega_x, \quad (1)$$

$$\langle \kappa^t X(\kappa, K) - K, p - p^*(\kappa, K) \rangle \leq 0, \quad \forall p \geq 0, \quad (2)$$

where  $x(\kappa, K)$  is the user equilibrium flow pattern,  $X(\kappa, K)$  is the aggregate user equilibrium link flow pattern,  $X(\kappa, K) = \int_{\alpha_{\min}}^{\alpha_{\max}} x(\kappa, K)(\alpha) d\alpha$ ,  $p^*(\kappa, K)$  is the equilibrium credit price. From Theorem 2, the uniqueness of the user equilibrium flow  $(x(\kappa, K), X(\kappa, K))$  and credit price  $p^*(\kappa, K)$  are provided.

LEMMA 1. For given  $(\kappa^0, K^0)$ , suppose the following conditions hold:

- (1) For all credit schemes in the neighborhood  $B(\kappa^0, K^0)$  of  $(\kappa^0, K^0)$ ,  $F$  is average strongly monotone on  $S_x(p)$ ,  $\forall p \geq 0$ .
- (2) The credit scheme satisfies Condition A at  $(\kappa^0, K^0)$ , i.e.,  $K^0 > K_l(\kappa^0)$ .
- (3) For credit scheme  $(\kappa^0, K^0)$ , all paths have distinct credit charges, i.e.,

$$T_1 > T_2 > \dots > T_{|R|-1} \text{ or } (\Delta^t \kappa^0)_j - (\Delta^t \kappa^0)_{j+1} \geq \delta > 0, \quad \forall j \in \langle 1, |R| - 1 \rangle.$$

Then the equilibrium price  $p^*(\kappa, K)$  is uniformly bounded on  $B(\kappa^0, K^0)$ .

**Proof.** Obviously, Assumptions (2) and (3) hold for the credit scheme  $(\kappa, K)$  in the sufficiently small neighborhood  $B(\kappa^0, K^0)$  of  $(\kappa^0, K^0)$ . Together with the assumption of average strong monotonicity for  $F$ ,  $X^*(\kappa, K)$  is unique and the equilibrium price  $p^*(\kappa, K)$  is bounded for all  $(\kappa, K) \in B(\kappa^0, K^0)$ . Furthermore, for the

maximum equilibrium price  $p_{\max}^*(\kappa, K)$ , there exists at least one breakpoint  $\hat{\alpha}_i(\kappa, K)$ ,  $i = 1, 2, \dots, |R| - 1$  such that

$$\hat{\alpha}_i(\kappa, K) = \frac{(T_i - T_{i+1})p_{\max}^*(\kappa, K)}{C_{i+1}(V(\kappa, K)) - C_i(V(\kappa, K))} \leq \alpha_{\max}, \quad (3)$$

or

$$\hat{\alpha}_i(\kappa, K) = \frac{((\Delta^t \kappa^0)_i - (\Delta^t \kappa^0)_{i+1})p_{\max}^*(\kappa, K)}{(\Delta^t F(X(\kappa, K)))_{i+1} - (\Delta^t F(X(\kappa, K)))_i} \leq \alpha_{\max}. \quad (4)$$

Otherwise, the minimum credit-charged equilibrium path is uniquely strongly undominated and all  $p \geq p_{\max}^*$  become equilibrium price which contradicts the boundedness of credit price.

Finally, since  $F(\cdot)$  is bounded and Assumption (3) holds, the right-hand side term of the following inequality is bounded for any  $(\kappa, K)$  on  $B(\kappa^0, K^0)$ :

$$p_{\max}^*(\kappa, K) \leq \frac{(\Delta^t F(X(\kappa, K)))_{i+1} - (\Delta^t F(X(\kappa, K)))_i}{((\Delta^t \kappa^0)_i - (\Delta^t \kappa^0)_{i+1})} \alpha_{\max}. \quad (5)$$

which gives rise to the desired uniform boundedness of credit price.  $\square$

Based on Lemma 1 in Appendix B and the uniqueness result of Section 3, the following sensitivity theorem establishes that a small change in credit scheme  $(\kappa, K)$  entering the parametric variational inequality  $VI(\kappa, K)$  induces a small change in the resulting solution.

**THEOREM 1 (Sensitivity results).** Suppose the assumptions of Lemma 1 hold and the density function  $h(\alpha)$  satisfies Condition C with  $\delta > 0$ . Then,

(i) the aggregate user equilibrium flow pattern  $X(\kappa, K)$  is continuous in  $(\kappa, K)$  on  $B(\kappa^0, K^0)$  and

$$\|X(\kappa_1, K_1) - X(\kappa_2, K_2)\|^2 \leq \frac{\overline{M}}{\beta} (\|K_1 - K_2\| + \|\kappa_1 - \kappa_2\|). \quad (6)$$

where  $\overline{M}$  is a positive constant;

(ii) credit price  $p^*(\kappa, K)$  and user equilibrium solution  $x(\kappa, K)$  of the MNEPTCS with credit scheme parameters are also continuous in  $(\kappa, K)$ .

**Proof.** For simplicity, denote  $x(\kappa_i, K_i)$  and  $p^*(\kappa_i, K_i)$  by  $x_i, p_i^*$  for  $i = 1, 2, \dots$  respectively.

(i) Rewriting (1) with  $\kappa = \kappa_1, K = K_1, x = x_2$  and  $\kappa = \kappa_2, K = K_2, x = x_1$ , then adding the resulting inequalities, one obtains

$$\langle \alpha(F(X(\kappa_1, K_1)) - F(X(\kappa_2, K_2))) + p_1^* \kappa_1 - p_2^* \kappa_2, x_2 - x_1 \rangle \geq 0 \quad (7)$$

Again rewriting (2) with  $\kappa = \kappa_1, K = K_1, p^* = p_2^*$  and  $\kappa = \kappa_2, K = K_2, p^* = p_1^*$ , then adding the resulting inequalities, one obtains

$$\langle (\kappa_1^t X(\kappa_1, K_1) - K_1) - (\kappa_2^t X(\kappa_2, K_2) - K_2), p_1^* - p_2^* \rangle \geq 0. \quad (8)$$

Using the average strong monotonicity condition, (7) yields

$$\begin{aligned} \langle p_1^* \kappa_1 - p_2^* \kappa_2, X(\kappa_2, K_2) - X(\kappa_1, K_1) \rangle &\geq \langle \alpha(F(X(\kappa_2, K_2)) - F(X(\kappa_1, K_1))), x_2 - x_1 \rangle \\ &\geq \beta \|X(\kappa_2, K_2) - X(\kappa_1, K_1)\|^2. \end{aligned} \quad (9)$$

By virtue of (7)-(9), we have

$$\begin{aligned} \langle p_2^* - p_1^*, K_1 - K_2 \rangle + \langle p_1^* X(\kappa_2, K_2) + p_2^* X(\kappa_1, K_1), \kappa_1 - \kappa_2 \rangle \\ \geq \langle p_1^* \kappa_1 - p_2^* \kappa_2, X(\kappa_2, K_2) - X(\kappa_1, K_1) \rangle \\ \geq \beta \|X(\kappa_2, K_2) - X(\kappa_1, K_1)\|^2. \end{aligned} \quad (10)$$

From Lemma 1, the equilibrium price  $p^*(\kappa, K)$  is uniformly bounded on  $B(\kappa^0, K^0)$ , (10) yields (6) and the continuity of  $X(\kappa, K)$ .

(ii) Suppose sequence  $\{(\kappa_n, K_n)\}$  converges to  $(\kappa, K)$ . Therefore, the following variational inequality system holds:

$$\text{VIS}_x(\kappa_n, K_n) : \quad \langle \alpha F(X(\kappa_n, K_n)) + p_n^* \kappa_n, x - x_n \rangle \geq 0, \quad \forall x \in \Omega_x, \quad (11)$$

$$\langle \kappa_n^t X(\kappa_n, K_n) - K_n, p - p_n^* \rangle \leq 0, \quad \forall p \geq 0. \quad (12)$$

Since  $x_n$  and  $p_n^*$  are bounded, then there exists the subsequence  $\{(x_{n'}, p_{n'}^*)\} \rightarrow (x_0, p_0^*)$ . Taking the limit in  $\text{VIS}_x(\kappa_{n'}, K_{n'})$ , we get

$$\text{VIS}_x(\kappa, K) : \quad \langle \alpha F(X(\kappa, K)) + p_0^* \kappa, x - x_0 \rangle \geq 0, \quad \forall x \in \Omega_x, \quad (13)$$

$$\langle \kappa^t X(\kappa, K) - K, p - p_0^* \rangle \leq 0, \quad \forall p \geq 0 \quad (14)$$

which states that  $(X(\kappa, K), x_0)$  is the solution of the MNEPTCS with credit scheme  $(\kappa, K)$ ,  $p_0$  is the credit price.

From Theorem 2, we get  $x_0 = x(\kappa, K)$ ,  $p_0^* = p^*(\kappa, K)$ . The continuity of  $x(\kappa, K)$  and  $p^*(\kappa, K)$  is provided by the aforementioned process.  $\square$

**COROLLARY 1.** If all assumptions of Theorem 1 hold, then for the MNEPTCS we have

(i) The first order moment of link flow  $\bar{X}(\kappa, K)$  is continuous in  $(\kappa, K)$ .

(ii) The total cost function  $\langle \alpha F(X), x \rangle$  is also continuous in  $(\kappa, K)$ .

**Proof.** For any  $x, y \in \Omega_x$ , we have

$$\begin{aligned} \|\bar{X} - \bar{Y}\|^2 &= \left\| \int_{\alpha_{\min}}^{\alpha_{\max}} \alpha(x(\alpha) - y(\alpha)) d\alpha \right\|^2 \leq 2 \int_{\alpha_{\min}}^{\alpha_{\max}} \langle \alpha(x(\alpha) - y(\alpha)), \alpha(x(\alpha) - y(\alpha)) \rangle d\alpha \\ &\leq 2\alpha_{\max}^2 \int_{\alpha_{\min}}^{\alpha_{\max}} \|x - y\|_2^2 d\alpha \\ &= 2\alpha_{\max}^2 \|x - y\|^2. \end{aligned}$$

Thus, the continuity of  $x(\kappa, K)$  ensures the continuity of  $\bar{X}$ . Combining the continuity of  $X$  and  $F(\cdot)$ , we conclude that the total cost function  $\langle \alpha F(X), x \rangle = \langle F(X), \bar{X} \rangle$  is also continuous in  $(\kappa, K)$ .  $\square$

Finally, we provide the sensitivity analysis results with respect to the total number of credits distributed  $K$ . Fixing credit charge  $\kappa$ , take  $K_l = \min_{x \in \Omega_x} \langle \kappa, X \rangle$  and  $K_u = \langle \kappa, X(0) \rangle$  where  $X(0) \in \text{Sol}(\text{VI}_x(0))$ . We call  $(K_l, K_u)$  the effective credit supply interval. The following proposition is useful for analysis and design of the credit scheme for the MNEPTCS.

**PROPOSITION 1 (Relation between credit supply and credit market price equilibrium).** For fixed  $\kappa$ , suppose the assumptions of Theorem 2 hold for credit scheme  $(\kappa, K)$  with  $K \in (K_l, +\infty)$ .

(1) If  $K \in [K_u, +\infty)$ , then we have unique zero credit price market equilibrium and unique user equilibrium  $X(0) \in \text{Sol}(\text{VI}_x(0))$ .

(2) If  $K \in (K_l, K_u)$ , then we have unique positive credit price market equilibrium. Moreover, the equilibrium credit price is decreasing with credit supply within the effective credit supply interval.

**Proof.**

(1) Let  $\Phi_K(p) = \langle \kappa, X(p) \rangle - K$  where  $X(p) \in \text{Sol}(\text{VI}_x(p))$ . Note that  $\Phi_{K_1}(p) < \Phi_{K_2}(p)$ , when  $K_1 > K_2$ . If  $K \in [K_u, +\infty)$ , we have  $\Phi_K(0) \leq \Phi_{K_u}(0) = \langle \kappa, X(0) \rangle - K_u = 0$  and we have unique credit market equilibrium  $p^*(\kappa, K) = 0$  and user equilibrium  $X(\kappa, K) = X(0)$ .

(2) If  $K \in (K_l, K_u)$ , we have  $\Phi_K(0) > \Phi_{K_u}(0) = 0$ , therefore  $p^*(\kappa, K) > 0$ . For  $K_1 < K_2$ ,  $K_i \in (K_l, K_u)$ ,  $i = 1, 2$ , we obtain

$$0 = \Phi_{K_2}(p^*(\kappa, K_2)) = \Phi_{K_1}(p^*(\kappa, K_1)) > \Phi_{K_2}(p^*(\kappa, K_1)).$$

From Proposition 7,  $\Phi_{K_2}(p)$  is nonincreasing, thus we get  $p^*(\kappa, K_2) < p^*(\kappa, K_1)$ .  $\square$
